# Supplementary material for: Tuning Au/SiO2 nanostructures from 1D to 3D interconnected nanotube networks using polycarbonate porous templates
Source: Royal Society of Chemistry journal article supplement (doi:10.1039/d3nr03783e), 2023-01-01
Supplement: d3nr03783e1.pdf [file d3nr03783e1.pdf]

## Tuning Au/SiO<sub>2</sub> nanostructures from 1D to 3D interconnected nanotube networks using polycarbonate porous templates

Fabien Drault,<sup>a,b</sup> Etienne Ferain,<sup>a,c</sup> Milena Chagas Lisboa,<sup>a</sup> Sophie Hermans<sup>\*b</sup> and Sophie Demoustier-Champagne<sup>\*a</sup>

<sup>a</sup> Institute of Condensed Matter and Nanosciences (BSMA division), UCLouvain, Croix du Sud 1, B-1348, Louvain-la-Neuve, Belgium. E-mail: sophie.demoustier@uclouvain.be

<sup>b</sup> Institute of Condensed Matter and Nanosciences (MOST division), UCLouvain, 1 Place Louis Pasteur, B-1348 Louvain-la-Neuve, Belgium. E-mail: sophie.hermans@uclouvain.be

<sup>c</sup> it4ip S.A., Avenue Jean-Etienne Lenoir 1, B-1348 Louvain-la-Neuve, Belgium

### Table of contents of the supplementary information

- Figure S1. SEM images of 1D mSiO<sub>2</sub> calcinated at 550 °C
- Figure S2. TEM image of 1D npSiO<sub>2</sub> NTs before (a) and after (b) electroless deposition of Au NPs with in the inset, the histogram of the Au particles size distributions, and (c) the evolution of the SiO<sub>2</sub> NTs wall thickness as function of the amount of EtOH used during the synthesis.
- Figure S3. TEM images of 1D Au mSiO<sub>2</sub> NTs materials with an Au deposition time (last step of the electroless deposition) of (a) 20 min and (b) 24 h.
- Table S1. Concentration of solutions studied for the Au electroless deposition in SiO<sub>2</sub> NTs.
- Figure S4. Study of the solutions concentration effect (detailed in the table S1) on the distribution of particle sizes determined by TEM.
- Figure S5. Pictures of the 1D and 3D Au/SiO<sub>2</sub> NTs with the electroless Au deposition performed (a and b) before or (c and d) after the template extraction step. For c and d, the composites are deposited on a PET membrane.
- Table S2. Mass percentage of C, O, Si and Au elements in Au/SiO<sub>2</sub> NTs measured by SEM-EDX and the calculated Au wt.% in Au/SiO<sub>2</sub> (by simply omitting the carbon contribution).
- Figure S6. Pictures of the system used for the photodegradation of MB in continuous flow, composed of a peristaltic pump, PVC tubes, a lamp (OSL2IR Fiber Illuminator) and a polycarbonate cell used as a flow-through reactor.

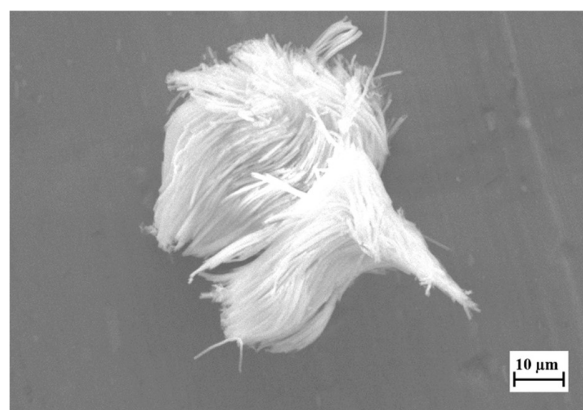

Figure S1. SEM images of 1D mSiO<sub>2</sub> calcined at 550 °C.

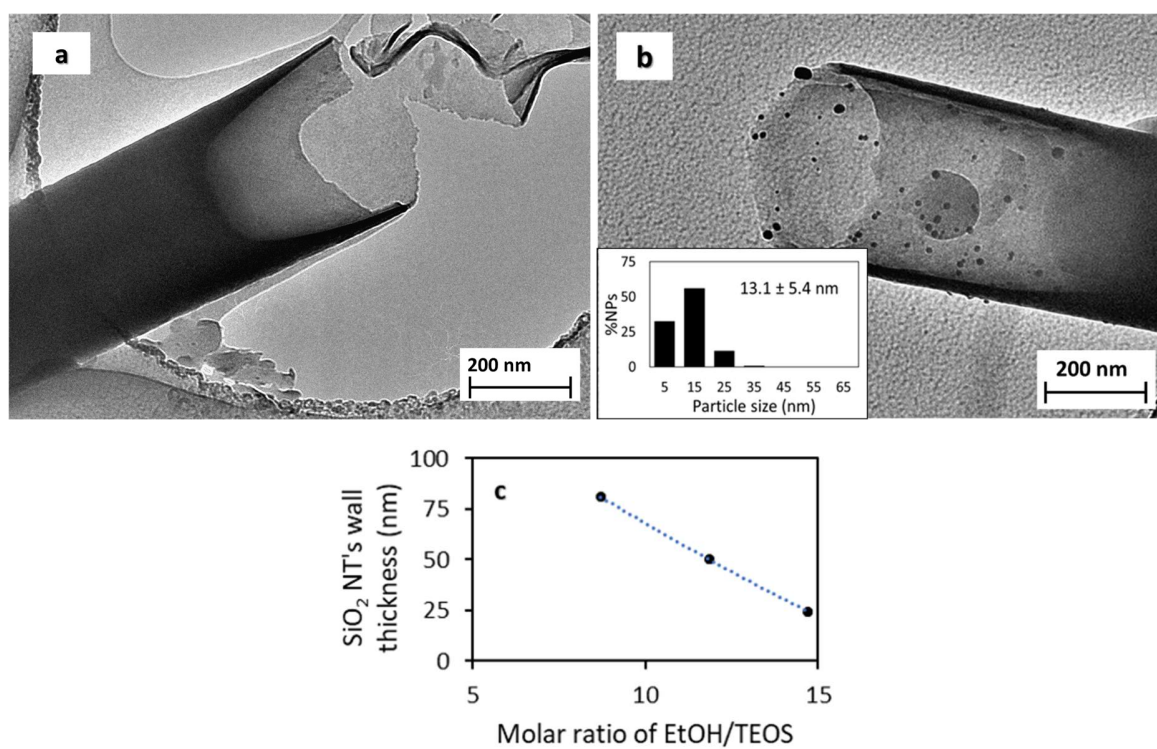

Figure S2. TEM image of 1D npSiO<sub>2</sub> NTs before (a) and after (b) electroless deposition of Au NPs with in the inset, the histogram of the Au particles size distributions, and (c) the evolution of the SiO<sub>2</sub> NTs wall thickness as function of the amount of EtOH used during the synthesis.

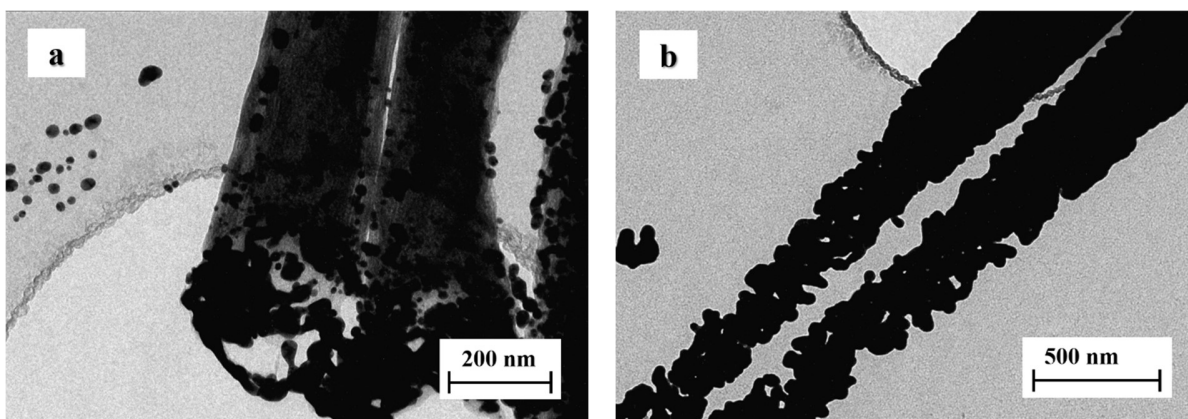

Figure S3. TEM images of 1D Au mSiO<sub>2</sub> NTs materials with an Au deposition time (last step of the electroless deposition) of (a) 20 min and (b) 24 h.

Table S1. Concentration of solutions studied for the Au electroless deposition in SiO<sub>2</sub> NTs.

| #                   | 1 (ref.)               | 2                      | 3                      | 4                      | 5                      | 6                      | 7                      |
|---------------------|------------------------|------------------------|------------------------|------------------------|------------------------|------------------------|------------------------|
| [Sn <sup>2+</sup> ] | 0.026 M                | 0.013 M                | 0.013 M                | 0.013 M                | 0.003 M                | 0.026 M                | 0.026 M                |
| <b>3 min</b>        |                        |                        |                        |                        |                        |                        |                        |
| [Ag <sup>+</sup> ]  | 0.029 M                | 0.029 M                | 0.015 M                | 0.015 M                | 0.003 M                | 0.029 M                | 0.029 M                |
| <b>2 min</b>        |                        |                        |                        |                        |                        |                        |                        |
| [Au <sup>+</sup> ]  | 7.9 10 <sup>-3</sup> M | 7.9 10 <sup>-3</sup> M | 7.9 10 <sup>-3</sup> M | 4.0 10 <sup>-3</sup> M | 7.9 10 <sup>-4</sup> M | 7.9 10 <sup>-4</sup> M | 7.9 10 <sup>-5</sup> M |
| <b>5 min</b>        |                        |                        |                        |                        |                        |                        |                        |

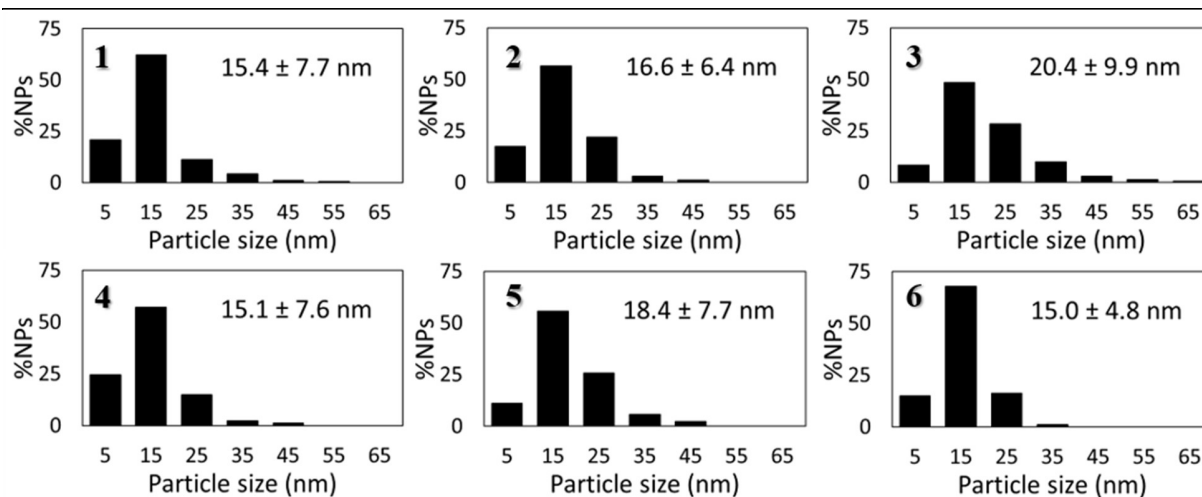

Figure S4. Study of the solutions concentration effect (as detailed in Table S1) on the distribution of particle sizes determined by TEM.

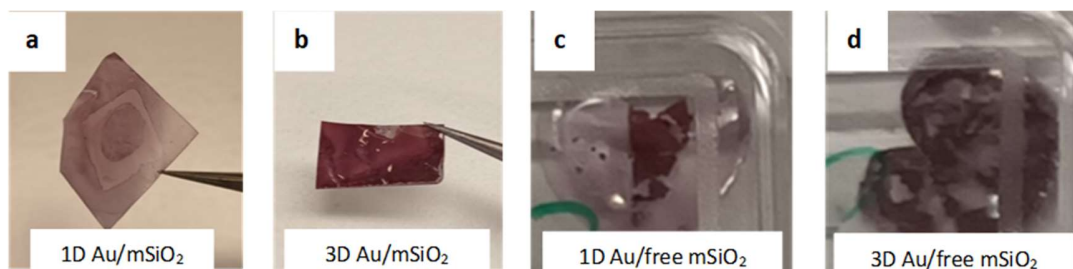

Figure S5. Pictures of the 1D and 3D Au/SiO<sub>2</sub> NTs with the electroless Au deposition performed (a and b) before or (c and d) after the template extraction step. For c and d, the composites are deposited on a PET membrane.

Table S2. Mass percentage of C, O, Si and Au elements in Au/SiO<sub>2</sub> NTs measured by SEM-EDX and the calculated Au wt.% in Au/SiO<sub>2</sub> (by simply omitting the carbon contribution).

| wt. %                     | 1D Au/npSiO <sub>2</sub> | 1D Au/mSiO <sub>2</sub> | 1D Au/free mSiO <sub>2</sub> | 3D Au/npSiO <sub>2</sub> | 3D Au/mSiO <sub>2</sub> | 3D Au/ free mSiO <sub>2</sub> |
|---------------------------|--------------------------|-------------------------|------------------------------|--------------------------|-------------------------|-------------------------------|
| C (0.3 keV)               | 17.2                     | 52.0                    | 23.3                         | 13.1                     | 25.1                    | 31.4                          |
| O (0.5 keV)               | 36.49                    | 33.4                    | 45.0                         | 24.4                     | 25.5                    | 39.2                          |
| Si (1.7 keV)              | 41.76                    | 9.7                     | 13.6                         | 59.8                     | 38.5                    | 12.9                          |
| Au (2.1 keV)              | 4.59                     | 5.0                     | 18.2                         | 2.7                      | 10.9                    | 16.4                          |
| Au in Au/SiO <sub>2</sub> | 5.5                      | 10.4                    | 23.7                         | 3.1                      | 14.6                    | 24.0                          |

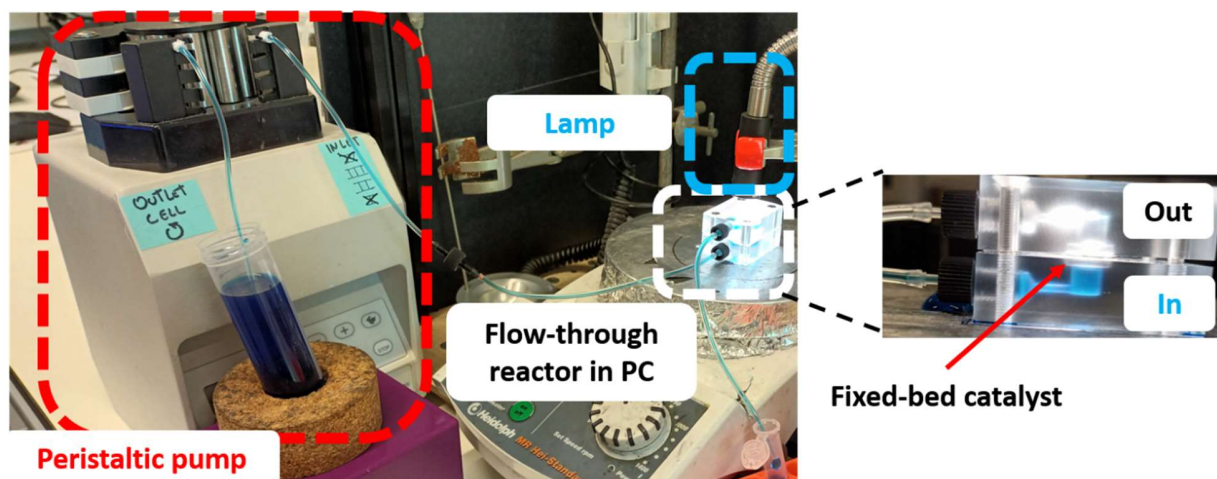

Figure S6. Pictures of the system used for the photodegradation of MB in continuous flow, composed of a peristaltic pump, PVC tubes, a lamp (OSL2IR Fiber Illuminator) and a polycarbonate cell used as a flow-through reactor.
